1 The dynamics of spawning acts by a  
2 semelparous fish and its associated  
3 energetic costs  
4

5 Cédric TENTEILIER<sup>1,2,a</sup>, Colin BOUCHARD<sup>1,2,3,b</sup>, Anaïs BERNARDIN<sup>1</sup>, Amandine  
6 TAUZIN<sup>1</sup>, Jean-Christophe AYMES<sup>1,2,c</sup>, Frédéric LANGE<sup>1,2,d</sup>, Charlotte RECAPET<sup>1,2,e</sup>,  
7 Jacques RIVES<sup>1,2,f</sup>

8

9 <sup>1</sup> Université de Pau et des Pays de l'Adour, E2S UPPA, INRAE, ECOBIOP, Saint-Pée-sur-  
10 Nivelle, France

11 <sup>2</sup> Pôle Gestion des Migrateurs Amphihalins dans leur Environnement, OFB, INRAE,  
12 AGROCAMPUS OUEST, UNIV PAU & PAYS ADOUR/E2S UPPA

13 <sup>3</sup> Tour du Valat, Research Institute for the Conservation of Mediterranean Wetlands, Arles,  
14 France

15 <sup>a</sup> ORCID: 0000-0003-2178-4900

16 <sup>b</sup> ORCID: 0000-0003-0845-9492

17 <sup>c</sup> ORCID: 0000-0002-1181-3010

18 <sup>d</sup> ORCID: 0000-0001-8561-1879

19 <sup>e</sup> ORCID: 0000-0001-5414-8412

20 <sup>f</sup> ORCID: 0000-0001-6074-3488

21

22 Corresponding author: Cédric TENTEILIER,

23 Université de Pau et des Pays de l'Adour

24 Collège STEE – Campus de la côte basque

25 1 allée du parc Montaury

26 64 600 Anglet, France.

27 [cedric.tentelier@univ-pau.fr](mailto:cedric.tentelier@univ-pau.fr)

28

## 29 Abstract

30 1. During the reproductive season, animals have to manage both their energetic budget and  
31 gamete stock. In particular, for semelparous capital breeders with determinate fecundity and no  
32 parental care other than gametic investment, the depletion of energetic stock must match the  
33 depletion of gametic stock, so that individuals get exhausted just after their last egg is laid and  
34 fertilized. Although these budgets are managed continuously, monitoring the dynamics of  
35 mating acts and energy expenditure at a fine temporal scale in the wild is challenging.

36 2. This study aimed to quantify the individual dynamics of spawning acts and the  
37 concomitant energy expenditure of female Allis shad (*Alosa alosa*) throughout their mating  
38 season.

39 3. Using eight individual-borne accelerometers for one month, we collected tri-axial  
40 acceleration, temperature, and pressure data that we analysed to i) detect the timing of spawning  
41 acts, ii) estimate energy expenditure from tail beat frequency and water temperature, and iii)  
42 monitor changes in body roundness from the position of the dorsally-mounted tag relative to  
43 the vertical plane.

44 4. Female shad had a higher probability to spawn during warmer nights, and their  
45 spawning acts were synchronized (both individually and inter-individually) within each active  
46 night. They experienced warmer temperature, remained deeper, swam more slowly and spent  
47 less energy during daytime than night time. Over one month of spawning, they performed on  
48 average 15.75 spawning acts, spent on average 6 277 kJ and died with a significant portion of  
49 residual oocytes. The acceleration-based indicator of body roundness was correlated to  
50 condition coefficient measured at capture, and globally decreased through the spawning season,  
51 although the indicator was noisy and was not correlated to changes in estimated energy  
52 expenditure.

53 5. Despite significant individual variability, our results indicate that female shad exhausted  
54 their energetic stock faster than their egg stock. Water warming will increase the rate of energy  
55 expenditure, which might increase the risk that shad die with a large stock of unspent eggs.  
56 Although perfectible, the three complimentary analyses of acceleration data are promising for  
57 *in situ* monitoring of energy expenditure related to specific behaviour.

## 58 Keywords

59 Accelerometer, biologging, clupeid, egg retention, energy budget, reproductive effort,  
60 semelparity, temperature, slimming.

61

## 62 Introduction

63           The energy acquired by living organisms is allocated to survival and reproduction, and  
64 natural selection is expected to favour optimal allocation, resulting in life-histories that  
65 maximize Darwinian fitness in the environment where evolution occurs (Pianka 1976; Stearns  
66 1992; Roff 1993). When adult survival is low compared to juvenile survival, extreme  
67 reproductive effort (in gametogenesis, mating behaviour and parental care) can be selected and  
68 semelparity may arise, in which individuals die after their first and only breeding season.  
69 Semelparity is often accompanied with capital breeding, so that reproduction relies on energy  
70 reserves constituted before the breeding season (Bonnet et al. 1998). Although semelparity is  
71 sometimes quoted as “big bang reproduction”, its broad definition encompasses cases where  
72 individuals breed in several bouts within a breeding season (Kirkendall and Stenseth 1985;  
73 Hughes 2017). Furthermore, in species with no other parental care than gametic investment, the  
74 optimal allocation should result in individuals dying just after their last progeny is produced,  
75 and deviation from optimality consists in individuals either surviving after their last egg is laid  
76 and fertilized, or dying of exhaustion while still bearing unlaid eggs (Heimpel and Rosenheim  
77 1998). Hence, the schedule of breeding events and the dynamics of energy expenditure during  
78 the breeding season, which may be pronounced in semelparous capital breeders, is a crucial  
79 aspect of reproductive strategy.

80           Beside energy expenditure, the temporal distribution of breeding events within a season  
81 may be linked to ecological, pheromonal or behavioural cues that synchronize breeding activity  
82 (Gochfeld 1980; Ims 1990; Fürtbauer et al. 2011). Here, internal and external stimulations  
83 probably interact, with the hormone-driven reproductive cycle and energetic condition  
84 determining whether an individual is ready to breed at a given time, and social or ecological  
85 factors triggering the actual breeding behaviour (Jovani and Grimm 2008; Koizumi and  
86 Shimatani 2016). At the ultimate level, reproductive synchrony affects intraspecific

87 competition for resources (including mates; Emlen and Oring 1977) and the risk of predation  
88 on breeders or their offspring (Ims 1990).

89         Tracking the schedule of breeding events and the dynamics of energy expenditure of  
90 breeding individuals in the wild is technically challenging. The timing of breeding events along  
91 the breeding season requires thorough observation of repeatedly detectable individuals, for  
92 example through video recording of highly sedentary individuals (e.g. Borgia 1985). Energy  
93 expenditure has been monitored at the population level, by quantifying energy reserves on  
94 different individuals sampled at different stages of the breeding season (e.g. Hendry and Berg  
95 1999). In some cases, the same individuals were captured at the beginning and at the end of the  
96 breeding season, and the energy expenditure quantified with difference in mass (Anderson and  
97 Fedak 1985; Rands et al. 2006), body composition (Hendry and Beall 2004; Casas et al. 2005),  
98 or concentration of plasma metabolites (Gauthey et al. 2015). Likewise, in terrestrial animals,  
99 the turnover of  $^{18}\text{O}$  and  $^2\text{H}$  from doubly labelled water quantifies the average field metabolic  
100 rate at the individual level between two sampling occasions (Nagy et al. 1999). All these  
101 methods give a good idea of the total energy expenditure over the whole breeding season but  
102 often lack the temporal resolution to document the longitudinal dynamics of energy expenditure  
103 all along the breeding season.

104         With the advent of bio-logging, the temporal resolution of individual data collected in  
105 the field has tremendously increased. Among bio-loggers, accelerometers, often coupled with  
106 other sensors such as thermometers, have been increasingly used, and advances in their  
107 energetic efficiency now allows to record high-frequency data for weeks or months, making  
108 them valuable tools for longitudinal studies of breeding behaviour in many organisms. In this  
109 context, acceleration data can quantify both the overall movement of tagged individuals (overall  
110 dynamic body acceleration), which can be translated in energy through laboratory calibration  
111 (Wilson et al. 2006; Groscolas et al. 2010; Collins et al. 2016; Hicks et al. 2017; Wilson et al.

112 2019), and the number and temporal distribution of key behaviours such as mating events, if  
113 these produce a typical acceleration pattern (Brown et al. 2013).

114 This study aimed at describing the activity and change in body condition of female Allis  
115 shad (*Alosa alosa* L. 1758) throughout their spawning season. Allis shad is a semelparous  
116 anadromous clupeid, a capital breeder with determinate fecundity (Baglinière et al. 2003). It is  
117 also a major halieutic resource in the Atlantic coast of southern Europe, and the size of most of  
118 its populations has plummeted since the beginning of the 21<sup>st</sup> century. Its economical and  
119 conservation value and its spawning behaviour are such that the timing of its reproduction is  
120 very well documented at the population level. The spawning act consists of at least one male  
121 and one female swimming side by side during five to ten seconds while describing three to five  
122 circles of one meter in diameter and beating the water surface vigorously with their tail  
123 (Baglinière and Elie 2000). The typical splashing noise (35 dB at one meter) can be heard and  
124 recorded from the river bank, and the number of splashes recorded during the spawning season  
125 is often used as an indicator of the number of spawners in a population (Chanseau et al. 2004).  
126 Despite the wealth of data on the timing of spawning acts across the season and within nights  
127 at the population level, no reliable data exist at the individual level (but see Acolas et al. 2004  
128 for a previous attempt), which is the appropriate level to eventually address the fitness  
129 associated to behavioural strategies.

130 Using accelerometers, we investigated three main aspects and tested specific predictions:

131 1) We described the individual schedule of spawning events, which were identified using  
132 a characteristic acceleration pattern. We tested whether the probability of spawning  
133 increased solely with water temperature (Paumier et al. 2019) or was also affected by  
134 internal and social factors. In particular, as oocytes seem to mature in five to seven  
135 batches (Cassou-Leins and Cassou-Leins 1981), we expected shad to perform five to  
136 seven spawning acts separated by a consistent time lapse corresponding to the

137 maturation time of each batch. Moreover, given the aggregative behaviour of shad,  
138 which shoal even during the spawning season (Baglinière and Elie 2000), we tested  
139 whether different females synchronize their spawning acts within a night.

140 2) We quantified global activity as tail beat frequency, and converted it to energy  
141 expenditure through an energetic model including water temperature. This was used to  
142 identify variability in energy expenditure between periods of the spawning season and  
143 to test the effect of energy management on the risk of dying with unlaidd eggs. In  
144 particular, we tested the predictions that shad were more active and spent more energy  
145 during the night than during the day, and that the individuals that better managed their  
146 energy expenditure (higher night time energy expenditure and lower daytime energy  
147 expenditure) died with fewer residual eggs.

148 3) We tested the possibility to use the angle between the dorsally-mounted accelerometer  
149 and the vertical plane as an indicator of body roundness of the fish. This novel method  
150 would allow monitoring the slimming process through the spawning season, and  
151 relating it to periods of high energy expenditure. We predict that if the angle of the  
152 accelerometer is a reliable indicator of fish condition, it should a) be correlated to the  
153 individual coefficient of condition measured at the beginning and the end of the  
154 spawning season, b) decrease across the spawning season, as the fish slims, c) decrease  
155 proportionally to mass loss, d) decrease more rapidly during periods of high energy  
156 expenditure.

157

## 158 Methods

### 159 Characteristics of the species studied

160 Allis shad (*Alosa alosa* L.) is an anadromous clupeid fish distributed along the Atlantic  
161 coast of Europe, from Portugal to the British Isles, with the main populations dwelling in the  
162 French rivers Garonne, Dordogne and Loire (Baglinière and Elie 2000). Across its distribution,  
163 Allis shad is considered as a semelparous species, although spawning marks on scales suggest  
164 that a very small proportion of individuals may spawn on two consecutive years (Mennesson-  
165 Boisneau and Boisneau 1990; Taverny 1991). After having spent a few months in freshwater  
166 as juveniles and four to six years at sea, shad undertake freshwater upstream migration during  
167 which they fast, thus qualifying as capital breeders. Gonad maturation occurring during  
168 migration leads females to bear between 13 000 and 576 000 eggs, reaching an average gonad  
169 mass of 221 g and a gonad / somatic mass ratio of 15% on spawning grounds (Cassou-Leins  
170 and Cassou-Leins 1981; Taverny 1991). Spawning typically occurs at night in a 0.3 to 3 metre-  
171 deep glide. As mentioned above, the spawning act consists of rapid circular swimming and  
172 vigorous tail beating for five to ten seconds, and should produce an easily detectable  
173 acceleration pattern. Although very few data are available, the number of splashes recorded  
174 upstream from dams where migrating shad were counted suggest that females perform on  
175 average five to twelve spawning acts during the season (Fatin and Dartiguelongue 1996; Acolas  
176 et al. 2006). Moreover, based on the dynamics of ovary index and oocyte diameter measured  
177 on individual caught and dissected across the season, Cassou-Leins & Cassou-Leins (1981)  
178 postulated that shad mature their eggs in five to seven batches.

179 The spawning season spans from early-May to late July, but dead individuals can be  
180 collected downstream from spawning ground as soon as late May. The number of splashes  
181 heard on spawning ground increases with increasing water temperature (Baglinière and Elie  
182 2000; Paumier et al. 2019), but this could be due to either more individuals being sexually active



183 or individuals to be more active at higher temperature. Within a night, the temporal distribution  
184 of splashes in large populations typically follows a Gaussian distribution centred on 2 AM and  
185 spanning from 10 PM to 6 AM (Cassou-Leins and Cassou-Leins 1981).

186 Shad being capital breeders, samples of different individuals caught at different times  
187 during the migration and reproduction have shown dramatic changes in somatic mass and tissue  
188 composition (Cassou-Leins and Cassou-Leins 1981; Bengen 1992), but no longitudinal data  
189 exist at the individual level.

190

## 191 [Fieldwork](#)

192 We conducted this study in spring 2017 and 2018 in the Nivelle, a 39 km long coastal  
193 river situated in the Northern Basque Country, France, and draining a 238 km<sup>2</sup> basin. The  
194 downstream limit of the study zone was the impassable Uxondoa weir, situated 12 km upstream  
195 from the river mouth (43°21'40.64"N, 1°35'13.99"W), and equipped with a vertical slot fishway  
196 and a trap where a yearly average of 230 (min = 26; max = 688) migrating shad have been  
197 counted since 1996, with less than 30 individuals per year since 2015. Five kilometres upstream  
198 from Uxondoa stands another impassable weir equipped with a fishway and a trap, where shad  
199 have almost never been captured.

200 The Uxondoa fish trap was controlled daily throughout spring (ECP 2018). Nine female  
201 shad were captured and tagged in 2017, and 15 in 2018. All experimental procedures comply  
202 with French and European legislation, and were approved by the legal representative  
203 (prefectural decree #64-2017-04-25-004) and the ethical committee for birds and fishes in the  
204 French region Nouvelle Aquitaine (authorization #2016020116037869). The tagging procedure  
205 was quite similar to Breine (2017) for twaite shad (*Alosa fallax*). We anesthetized each  
206 individual in a bath of 15 mg/L benzocaine diluted in river water before weighing it, measure  
207 its fork length, gently press the abdomen to check the absence of sperm emission, and finally

208 tag it with a radio transmitter emitting at a unique frequency (F2020, ATS, Isanti, MN, USA)  
209 and a three-dimensional accelerometer (WACU, Atesys-Montoux, Huguenau, France). For  
210 tagging, each fish was kept in a 20 L tank filled with anaesthetic solution (Fig. 1.A). A water  
211 pump placed in the fish's mouth and a stone bubbler in the bath ensured a good circulation of  
212 aerated water during the tagging procedure. Adjustable plastic plates covered with foam were  
213 placed vertically against both flanks to maintain the fish in an upright position, with only its  
214 back being above water surface. The radio transmitter and the accelerometer were cleaned with  
215 a povidone iodine solution (Betadine®) and dried with surgical cotton. The two Teflon-coated  
216 metallic wires of the radio transmitter were inserted 1 cm under the dorsal fin through sterile  
217 hollow needles. The hollow needles were then removed, and the metallic wires were passed  
218 through holes drilled in the accelerometer's lug, secured with plastic eyelets and aluminium  
219 sleeves, and the extra length was cut. The radio transmitter and the accelerometer weighed 8.6  
220 g and 9 g, respectively, so the weight was balanced on both sides of the fish. After tagging, each  
221 fish was placed in a 50 L box filled with river water, and released upstream from the weir upon  
222 waking.

223 From its release at Uxondoa weir until its death at the end of the spawning season, each  
224 tagged shad was localized twice a day using a mobile receiver (R2100, ATS, Isanti, MN, USA)  
225 and a loop antenna, in order to check whether it was still alive and to obtain its position. The  
226 radio transmitters were set to double their pulsing rate after 8 h of total immobility. Within two  
227 days after double pulse was detected, the dead fish and the tags were recovered by snorkelling,  
228 and the whole fish and its ovaries were immediately weighed.

229

### 230 [Processing acceleration data](#)

231 The loggers used in this study recorded acceleration between -8 g and +8 g (1 g = 9.81  
232 m.s<sup>-2</sup>) in each of the three dimensions at an average frequency of 50 logs per second. Every

233 second, they also recorded the temperature, pressure, date, time and exact number of  
234 acceleration logs within the past second. Both dynamic and static (gravitational) acceleration  
235 were used to estimate three types of variables: body roundness through the angle of the  
236 accelerometer with the vertical plane, tail beat frequency and occurrence of spawning acts.

237 The static, gravitational, component on each axis  $i$  ( $x$ ,  $y$  and  $z$ ) was extracted from the  
238 raw signal at each time  $t$  by replacing each data point  $\overrightarrow{A}_{i,t}$  by the average of the points within a  
239 window of width  $w$  centred on  $t$ , so that:

$$240 \quad \overrightarrow{SA}_{i,t} = \frac{1}{w} \sum_{j=t-\frac{w}{2}}^{j=t+\frac{w}{2}} \overrightarrow{A}_{i,j}$$

241 Unlike what is usually done (Brown et al. 2013), these data were not used to assess the  
242 posture of the fish, as no known behaviour in shad involves change of posture. Instead, we  
243 hypothesized that it may reflect the shape of the fish. Indeed, since the accelerometer was  
244 pinned on the dorsal part of the fish's flank, the angle  $\theta$  between the  $x$ -axis of the tag and the  
245 vertical plane may be linked to the roundness of the fish, a proxy of its energetic reserves. This  
246 angle could be computed at any data point of static acceleration, as  $\theta_t = \cos^{-1}(\overrightarrow{SA}_{x,t})$ , where  
247  $\theta_t$  is the angle at time  $t$  and  $\overrightarrow{SA}_{x,t}$  is the static acceleration computed on the  $x$ -axis at time  $t$  (Fig.  
248 1.B). To track change in body roundness through the season,  $\theta$  was estimated for each fish from  
249  $\overrightarrow{SA}_{x,t}$  computed over  $w=180\,000$  points (*i.e.* 1 h at a 50Hz sampling frequency) every eight  
250 hours (6AM, 2PM, 10PM), from its release until its death.

251

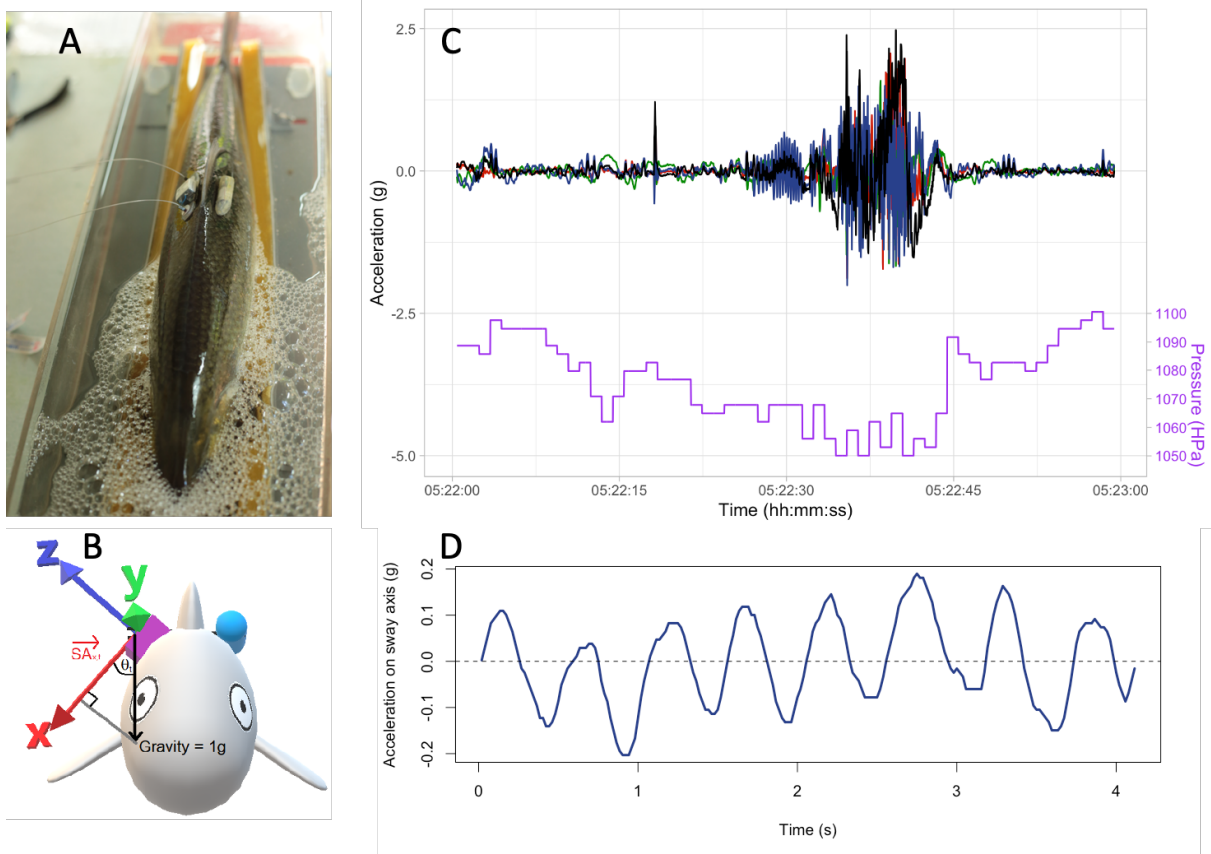

252

253 **Figure 1.** A. Allis shad were tagged under anaesthesia with a radio transmitter on the left flank

254 and an accelerometer on the right flank. The accelerometer continuously recorded acceleration

255 on three axes. B. The static component of acceleration recorded on the x-axis at time  $t$ ,  $\overrightarrow{SA_{x,t}}$ ,

256 corresponds to the orthogonal projection of gravity, which is vertical by definition, on this axis.

257 Hence, the angle  $\theta$  between the x-axis and the vertical plane can be computed for any time  $t$  as

258  $\theta_t = \cos^{-1}(\overrightarrow{SA_{x,t}})$ . C. The dynamic component of acceleration (here smoothed with a 31-point

259 wide median filter) can be used to detect spawning acts, characterized by increased acceleration

260 on both x (red), y (green) and y (blue) axes, resulting in a peak in the norm of the 3-dimensional

261 acceleration vector (black), and accompanied by a decrease in hydrostatic pressure (purple). D.

262 After correction for the  $\theta$  angle, the z-axis corresponds to the sway axis of the fish, and its

263 dynamic component (here smoothed with a 5-point wide median filter) can be used to compute

264 tail beat frequency (TBF) as the number of zero-crossings per unit of time.

265

266 The dynamic component of acceleration was computed at every time point on each  
267 dimension  $i$  ( $\overrightarrow{DA}_{i,t}$ ) as the raw signal minus the static acceleration computed over  $w=250$  points  
268 (= 5 s at 50 Hz). This was used to count the number of spawning events performed by each  
269 tagged shad. To do this, the acceleration pattern typical of spawning act was first described in  
270 a controlled experiment and then searched in the field-collected data. To characterize the typical  
271 pattern associated with spawning act, a male (420 mm, 855 g) and a female (460 mm, 1140 g)  
272 shad were captured at Uxondoa trap, tagged as described above, and observed for one month  
273 (June 2016) in a basin (400 m<sup>2</sup>, 0.6 m water depth) at the INRAE experimental facilities in St  
274 Pée sur Nivelles (ECP 2018). Eight spawning acts were recorded on video or audio, which could  
275 be compared with acceleration data. The typical pattern of acceleration associated to the  
276 spawning act was a rise in the norm of the 3D acceleration vector, which stayed above 3 g for  
277 at least 3 seconds, mainly driven by acceleration on the z-axis corresponding to TBF reaching  
278 up to 15 beats per second. (Fig. 1.C). A decrease of hydrostatic pressure was typically  
279 associated to this pattern, due to the fish reaching the water surface during the spawning act.  
280 These criteria for identification of spawning acts were robust, as they were always detected  
281 when spawning was visually observed (no false negative) and never observed when spawning  
282 was not visually observed (no false positive). These criteria were implemented in an algorithm  
283 to scan the accelerograms collected in the field in 2017. This automated identification was  
284 validated by visual comparison of accelerogram sequences automatically identified in 2017  
285 with sequences of eight acknowledged spawning acts recorded in 2016.

286 The dynamic acceleration was also used to quantify the activity of the fish through Tail  
287 Beat Frequency (TBF), computed as the number of zero-crossings per second of  $\overrightarrow{RDA}_{z,t}$  on  
288 which a median filter (window width = 5 points) was applied for noise reduction (Fig. 1.D).  
289 Acceleration on the sway axis is commonly used to measure TBF on fishes of different species  
290 and sizes (Kawabe et al. 2003; Tsuda et al. 2006; Broell and Taggart 2015; Brownscombe et al.

291 2018), and preliminary data on the two captive individuals mentioned above showed that our  
292 acceleration-based measurement of TBF corresponded to the visual measurement. TBF can be  
293 computed at every instant, but for further analysis we used average computed for every minute.

294 We estimated the energy consumption for every minute of each individual's  
295 reproductive season, using its tail beat frequency (computed as described above), the  
296 temperature recorded by the individual logger, and equations derived from the data of Leonard  
297 et al. (1999) and Castro-Santos & Letcher (2010) on American shad, *Alosa sapidissima*.  
298 Leonard et al. (1999) measured oxygen consumption and tail beat frequency of 18 American  
299 shad in a swimming respirometer with water temperature varying between 13°C and 24°C. On  
300 their data, we fitted a linear mixed model (lmer function in lme4 package; Bates et al. 2014)  
301 with individual random intercept and fixed effects of temperature and TBF, on log-transformed  
302 oxygen demand ( $MO_2$ , in  $mmol\ O_2 \cdot kg^{-1} \cdot h^{-1}$ ). Then, assuming that 0.4352 kJ of somatic energy  
303 are burnt per  $mmol\ O_2$  (Brett and Groves 1979), we used the three parameters of the mixed  
304 model (average intercept = 1.0064, slope of temperature = 0.0531, and slope of TBF = 0.2380)  
305 to compute the amount of energy  $E_{i,t}$  (in kJ) consumed by each fish  $i$  for each minute  $t$  of its  
306 spawning period, from its body mass  $M_{i,t}$  (in kg), the average temperature recorded by its logger  
307 during that minute  $T_{i,t}$  (in °C), and its average tail beat frequency during that minute  $TBF_{i,t}$  (in  
308 beat per second):

$$309 \quad E_{i,t} = \frac{1}{60} \times 0.4352 \times M_{i,t} \times e^{1.0064+0.0531 \times T_{i,t}+0.2380 \times TBF_{i,t}} \quad (\text{Equation 1})$$

310 Since energy consumption continually reduces fish mass, we iteratively modelled fish mass and  
311 energy expenditure at each minute of the spawning season. For this, we assumed that shad get  
312 69% of their energy from lipids and 31% from proteins to fuel their metabolism (Leonard &  
313 McCormick, 1999), and that one gram of fat yields 39.54 kJ, against 23.64 kJ per gram of protein  
314 (Craig et al. 1978), so fish mass at the  $t^{\text{th}}$  minute was:

$$315 \quad M_{i,t} = M_{i,t-1} - \frac{E_{i,t}}{0.69 \times 39.54 + 0.31 \times 23.64} \cdot 10^{-3} \quad (\text{Equation 2})$$

316 Finally, the exact timing of each individual's death was detected as a clear change in the  
317 acceleration signal, where the gravitational component indicated that the fish switched from  
318 upright posture to lying on its side or upside down, and the only dynamic component left was  
319 the tenuous jiggling due to water flowing over the tag.

320 Beside acceleration, the pressure data given by the tags was processed to translate it to  
321 depth by computing hydrostatic pressure ( $1\text{hPa}\cdot\text{cm}^{-1}$ ) as the difference of pressure recorded  
322 every second by each tag and the atmospheric pressure recorded every 20 minutes by a  
323 meteorological station situated at the INRAE facilities, less than one kilometre from the  
324 spawning ground.

325

## 326 [Statistical analysis](#)

327 All analyses were performed on R (R Development Core Team 2008). A zero-inflated  
328 mixed regression (package `glmmTMB`; Brooks et al. 2017) was used to test the effect of  
329 temperature on the number of spawning acts performed by each individual on each night. The  
330 Binomial component of the model informed on the effect of temperature on the probability to  
331 perform any spawning act, while the Poisson component tested the effect of temperature on the  
332 number of spawning acts. Individual was used as a random effect on both components. To test  
333 whether females spawning in the same night synchronized their spawning acts with each other,  
334 we performed 10 000 permutations of the hour of spawning acts recorded along all nights, and  
335 compared the median of the delay to the nearest spawning act for actual data and for simulated  
336 data. Because our aim was not to test the synchrony between acts performed by the same female,  
337 only the first act performed by each female on a given night was considered in this analysis.

338 As mentioned above, TBF was computed for every minute of each individual's  
339 spawning season, to track its energy expenditure. As an indicator of fish activity, average TBF  
340 was also aggregated over eight-hour time windows corresponding to three periods of the day:



341 morning (6AM-2PM), afternoon (2PM-10PM) and night (10PM-6AM). The limits of the night  
342 period correspond to the earliest and latest hour of spawning activity classically recorded on  
343 spawning grounds (Cassou-Leins and Cassou-Leins 1981). To test whether shad adopted a  
344 different behaviour at different periods of the day, linear mixed models with individual random  
345 intercept and period of the day as a fixed effect were fitted to TBF, temperature and depth. For  
346 TBF, we also added a binary covariate indicating whether the fish had been tagged for more or  
347 less than three days, to test whether recent tagging increased activity (as observed in Atlantic  
348 salmon by Føre et al. 2020). All mixed models were fitted using the package lme4 for R (Bates  
349 et al. 2014), significance of fixed effects was tested using the likelihood ratio test (LRT  $\chi^2$ )  
350 between the model including the fixed effect and the nested model excluding it. Marginal and  
351 conditional  $R^2$  ( $R^2_m$  and  $R^2_c$ ), indicating the proportion of variance explained by the fixed effects  
352 and by the whole model, respectively, were computed using R package MuMIn (Barton 2009).

353 To our knowledge, static acceleration has never been used to assess changes in animal  
354 body roundness. As mentioned in the introduction, we tested four predictions resulting from the  
355 hypothesis that the angle  $\theta$  between the x-axis of an individual's accelerometer and the vertical  
356 plane was an indicator of body roundness. First, we fitted a Pearson correlation between Fulton  
357 condition coefficient ( $100 \cdot \text{mass (in grams)} / \text{length (in centimetres)}^3$ ) and  $\theta$ , both measured at  
358 the initial capture and at death. Second, a linear mixed model, with individual random intercept  
359 and slope was used to test whether  $\theta$  decreased with time since individual release. Depth was  
360 added in this model, to account for the possibly positive effect of swim bladder inflation (hence  
361 negative effect of depth) on body roundness. Third, to test if change in  $\theta$  over the breeding  
362 season was proportional to change in condition, a correlation was performed between the  
363 differences in  $\theta$  and in Fulton condition coefficient from release to death. Finally, to test  
364 whether the decrease in  $\theta$  could be linked to temperature, activity, energy expenditure or the  
365 moment of the days, we fitted linear mixed models with the difference in  $\theta$  between the first



366 and the last hour of each 8-hour period and an individual random intercept. Four models were  
367 tested, 1) the null model with only random intercept, 2) a model with average temperature and  
368 TBF during the 8-hour period as fixed effects, 3) a model with cumulated energy expenditure  
369 during the 8-hour period as a fixed effect, and 4) a model with the moment of the period  
370 (morning, afternoon, night) as a fixed effect. To compare mixed models corresponding to  
371 alternative hypotheses, we used Akaike Information Criterion corrected for small sample bias  
372 (AICc) on R package MuMIn (Barton 2009).

373 The R code for statistical analysis and the data sets on which they were performed are  
374 available in the institutional data repository of the INRAE (French National Institute for  
375 Agriculture Food and Environment): <https://doi.org/10.15454/NTFYCC>.

376

## 377 Results

378 The nine female shad tagged in 2017 survived between 20 and 37 days (mean=26 days),  
379 and all tags were retrieved within one or two days after fish died, although one tag stopped  
380 recording data after ten days. The 2018 campaign was much less successful: two fish died one  
381 week after tagging, before any spawning acts were recorded; two fish lost their tags three and  
382 four days after tagging. The eleven remaining fish were radio tracked throughout the spawning  
383 season, until two exceptional floods (on June 7<sup>th</sup> and 16<sup>th</sup>) flushed them down to the estuary and  
384 the ocean where high water conductivity prevented further radio tracking, hence making tag  
385 retrieval impossible. Eventually, among the 25 tagged shad, only eight fully exploitable and  
386 one partially exploitable accelerograms could be collected. This sample of eight females  
387 represented half of the females that passed the Uxondoa weir in 2017, but the power of  
388 Spearman correlations to detect even a strong correlation of 0.5 between variables observed at  
389 the individual level was only 0.22. The minimal, median and maximal fork length and body  
390 mass of the eight females were 470, 510 and 550 mm, and 1320, 1635 and 1810 g.

391 According to their accelerograms, the eight female shad performed 7, 9, 12, 14, 14, 17,  
 392 24 and 26 spawning acts (mean=15.75). The total number of spawning acts performed by each  
 393 female was correlated to none of the individual variables tested (Fig. 2).  
 394

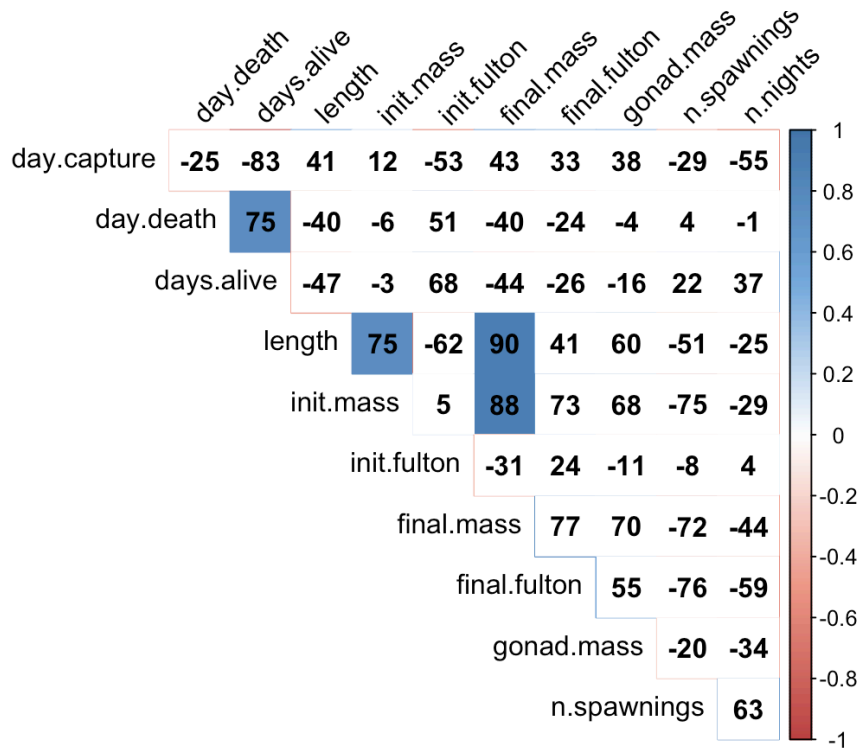

395  
 396 **Figure 2.** Spearman coefficient of correlation (expressed as percentage) between biometric and  
 397 reproductive variables of female Allis shad. In order, day of capture, day of death, number of  
 398 days between capture and death, body length, initial mass, initial Fulton coefficient of  
 399 condition, final mass, final Fulton coefficient of condition, final gonad mass, number of  
 400 spawning acts, number of nights with at least one spawning act.

401  
 402 For each female, spawning acts were distributed in three to six nights (mean=4.87) each  
 403 separated by zero to eight nights (mean=3.55) without spawning acts, resulting in individual  
 404 spawning seasons ranging from 14 to 24 nights (mean=18.12) from the first spawning act to the  
 405 last (Fig. 3.A). The tagged females performed their first spawning act zero to eight days after  
 406 tagging (mean=3). Only on eight occasions did a female perform a single spawning act during

407 a night, so the 137 remaining acts were performed in volleys. At the individual level, an active  
408 night comprised from two to eight acts (mean=3.23) performed in two to 84 minutes  
409 (mean=29.7). The mixed zero-inflated Poisson regression indicated that water temperature  
410 during the night had a positive effect on the probability that a female performed at least one  
411 spawning act (negative effect on the zero inflation;  $z=-1.95$ ,  $p=0.05$ ; probability of a spawning  
412 act estimated 0.18 at 18°C and 0.23 at 19°C) but no effect on the number of spawning acts in  
413 the volley (the Poisson component;  $z=-1.44$ ,  $p=0.15$ ). Cumulated over all the season, the  
414 temporal distribution of spawning acts within the night followed a Normal distribution, centred  
415 on 3AM, with 95% of spawning acts occurring between 0:30AM and 5:30AM. However, the  
416 permutation test on the hour of spawning acts indicated synchrony between acts performed by  
417 different females on the same night: the median time lag to the nearest act was one hour for  
418 observed data, which corresponds to the first percentile of simulated data (Fig. 3.B).  
419

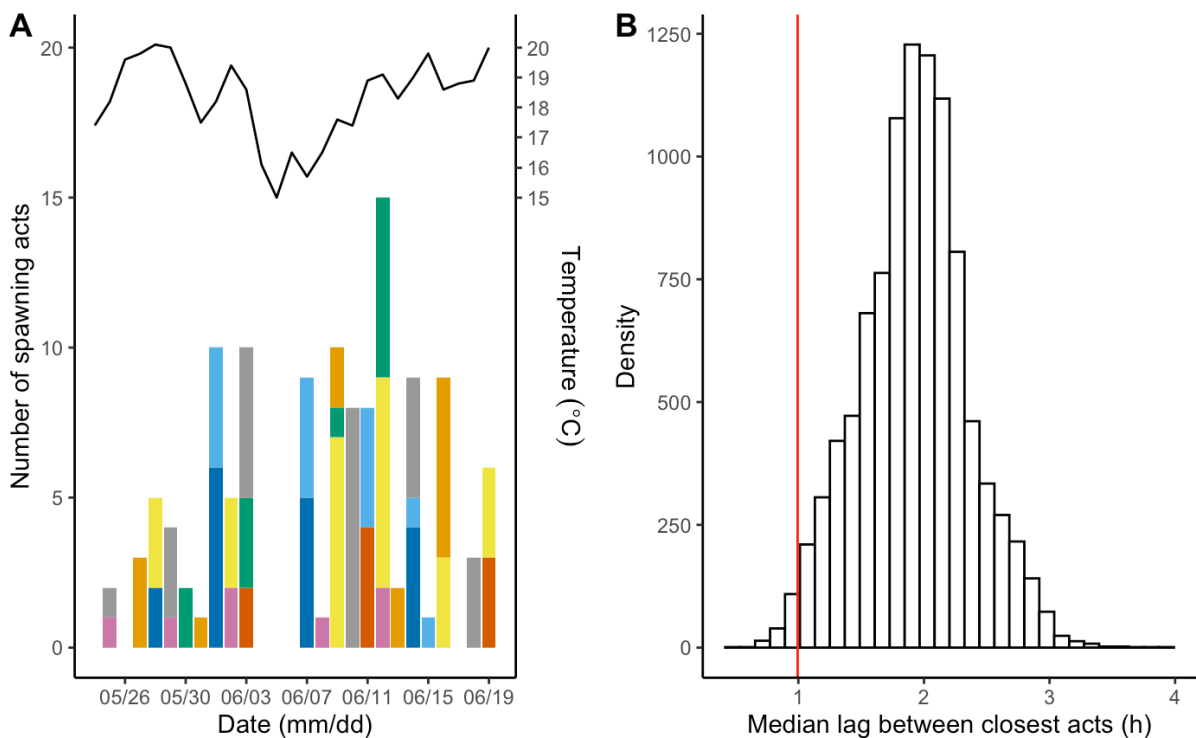

420

421 **Figure 3.** The temporal distribution of spawning acts by eight Allis shad females in the river

422 Nivelle in spring 2017. A. Cumulated number of spawning acts for each night of the season.

423 Each colour corresponds to an individual. The line above the bar plot represents the average  
424 water temperature measured each night between 10PM and 7AM. B. Synchrony of spawning  
425 acts performed by different females within a night (only the first act of the night, for each  
426 female). The red vertical line represents the median time lag between nearest spawning acts for  
427 observed data. The histogram represents the same thing for 10 000 permutation of the hour of  
428 the acts.

429

430 Average tail beat frequency (TBF), temperature and depth were computed for 312 840  
431 minutes across all individuals' spawning seasons (eight complete and one partial). Tail beat  
432 frequency ranged from 1.3 to 9.5 beats per second (mean=3.2), temperature ranged from 13.5  
433 to 23.8°C (mean=18.3), and depth ranged from 0 to 400 cm (mean=186).

434 From equations (1) and (2), the estimated instantaneous rate of energy expenditure  
435 ranged from 0.09 to 0.89 kJ.min<sup>-1</sup> (mean=0.17), and total energy expenditure by each of the  
436 eight individuals from initial capture to death ranged from 4 395 to 8 361 kJ (mean=6 277; Fig.  
437 4.A). The corresponding mass loss was estimated to range from 127 to 241 g (mean=181),  
438 representing from 9% to 17% of initial mass (mean=12%). The shad died 44 to 182 hours  
439 (mean=98.62) after their last spawning act. They had lost between 33% and 53% of their mass  
440 (mean=42%), and their ovaries weighed 25.9 to 141.5 g (mean=79.7). No correlation was found  
441 between mass loss and ovary mass (Spearman S=89.3; rho=-0.06; p=0.888). The predicted and  
442 observed mass lost during the season were positively correlated, (Spearman S=8.55; rho=0.9;  
443 p=0.002; Fig. 4.B), but the observed mass loss was on average 1.5 times more than predicted  
444 (479 g difference on average).

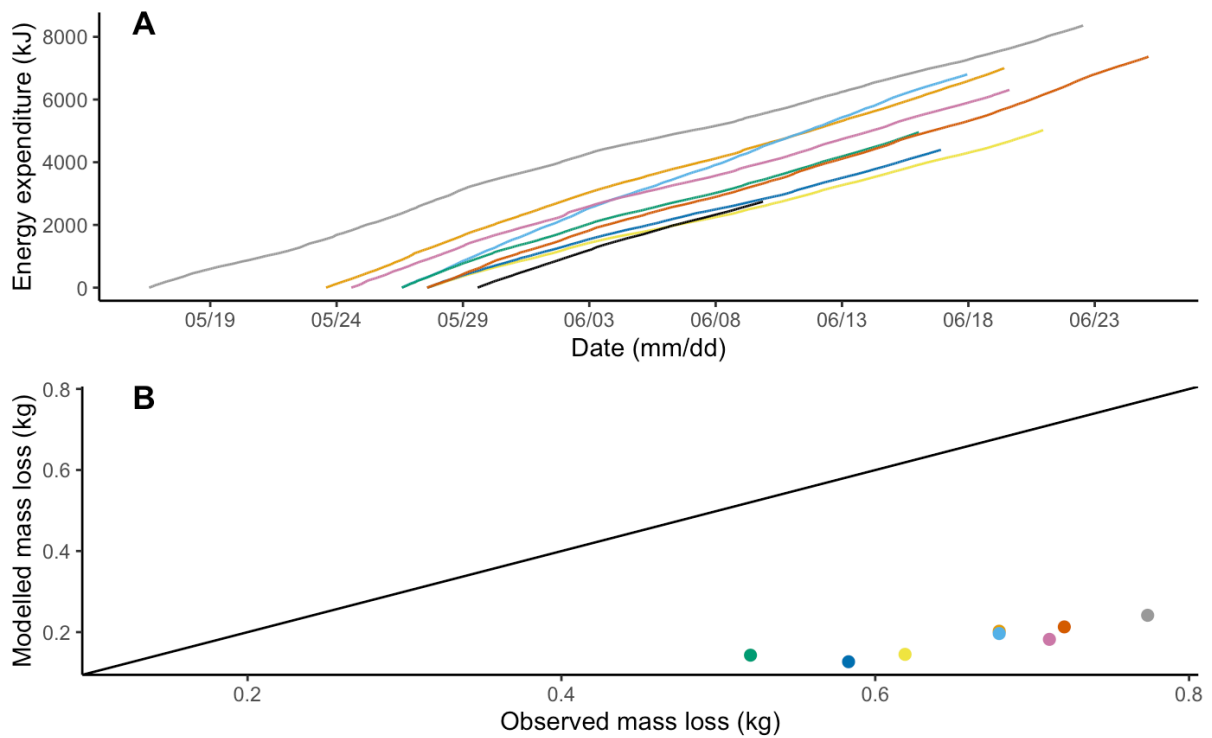

445

446 **Figure 4.** A. Energy expenditure over the spawning season for nine female Allis shad, estimated

447 from temperature and tail beat frequency using equations (1) and (2). B. Observed mass loss

448 and mass loss modelled with equations (1) and (2) over the spawning season. The straight line

449 in B is the one on which points should lie if the modelled mass loss would fit the observations.

450 Colours are as in Fig. 3, with black line in A for the individual whose tag stopped recording

451 before the end of the experiment.

452

453 Aggregating TBF, temperature and pressure data over 8-hour periods (morning: 6AM-

454 2PM, afternoon: 14PM-10PM, night: 10PM-6AM) produced 649 8-hour periods (Fig. 5). Shad

455 stayed closer to the surface at night (163 cm) than during the morning and afternoon (200 cm)

456 (LRT  $\chi^2=238.9$ ;  $p<0.0001$ ;  $R^2_m=0.14$ ;  $R^2_c=0.69$ ), and experienced warmer temperature in the

457 afternoon (18.5°C) than in the night (18.3°C) than in the morning (17.9°C) (LRT  $\chi^2=15.8$ ;

458  $p<0.0001$ ;  $R^2_m=0.02$ ;  $R^2_c=0.05$ ). TBF was higher at night (3.24 beats/s) than in the afternoon

459 (3.11 beats/s) than in the morning (3.06 beats/s) (LRT  $\chi^2=26.8$ ;  $p<0.0001$ ) and was also 0.21

460 beats/s higher during the first nine periods (three days) just after tagging than afterwards (LRT

461  $\chi^2=37.6$ ;  $p<0.0001$ ;  $R^2_m=0.06$ ;  $R^2_c=0.36$  for the model including both effects). The estimated  
462 energy expenditure was the highest at night (83 kJ/8h), followed by afternoon (82 kJ/8h) and  
463 morning (77 kJ/8h) (LRT  $\chi^2=24.8$ ;  $p<0.0001$ ;  $R^2_m=0.03$ ;  $R^2_c=0.34$ ). The mass of eggs  
464 remaining at death was not correlated to the energy expenditure cumulated across mornings  
465 (Spearman  $S=66$ ;  $\rho=0.21$ ,  $p=0.619$ ), afternoons (Spearman  $S=64$ ;  $\rho=0.24$ ;  $p=0.582$ ), nights  
466 (Spearman  $S=76$ ;  $\rho=0.09$ ;  $p=0.84$ ), or the whole season (Spearman  $S=64$ ;  $\rho=0.24$ ;  
467  $p=0.582$ ).  
468

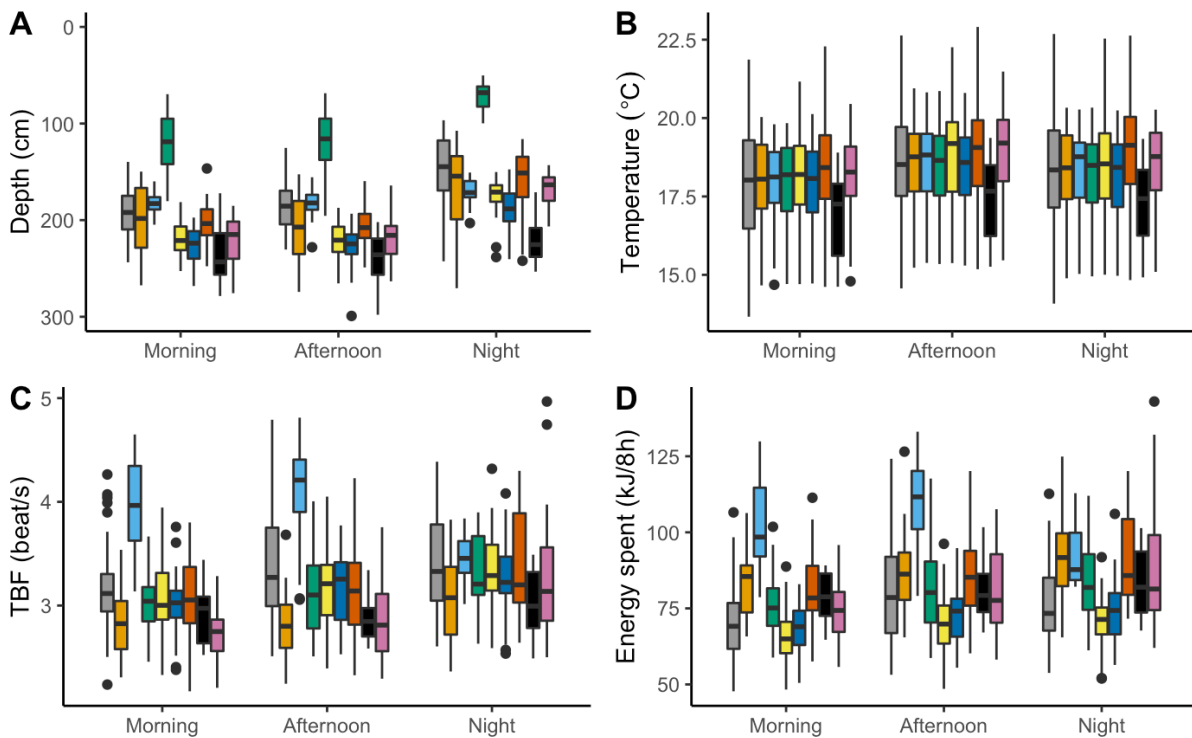

469  
470  
471 **Figure 5.** Depth (A), temperature (B), tail beat frequency (C) and estimated energy spent (D)  
472 by nine female allis shad during the morning (6AM:2PM), afternoon (2PM:10PM) and night  
473 (10PM:6AM) of their spawning season. Box plots show the distribution of the variables  
474 averaged (A, B, C) or cumulated (D) across 8-hour periods for each individual (colours as in  
475 Fig. 3, black for the individual whose tag stopped recording before the end of the experiment).  
476 In C, energy spent was computed from temperature and TBF using equations (1) and (2).

477

478           As expected, the  $\theta$  angle between the x-axis of the accelerometer and the vertical plane  
479 was positively correlated to the individual's Fulton coefficient of condition (Pearson's  $r=0.63$ ;  
480  $p=0.006$ ), although the effect seemed to be due to within-individual difference in condition and  
481  $\theta$  at the beginning and at the end of the season rather than inter-individual variability in  
482 condition and  $\theta$  (Fig. 6.A). The  $\theta$  angle globally decreased over time for all individuals and was  
483 negatively related to depth, resulting in occasional increases in  $\theta$  during 8-hour periods when  
484 shad stayed closer to the surface (full model  $R^2_m=0.28$ ;  $R^2_c=0.79$ ; Fig. 6.B). The effect of time  
485 corresponded to a slope of  $-0.63$  degree per day (LRT  $\chi^2=518.4$ ;  $p<0.001$ ) and the effect of  
486 depth corresponded to a slope of  $-0.017$  degree per cm (LRT  $\chi^2=9.6$ ;  $p=0.002$ ). Contrary to our  
487 expectation, the difference of the  $\theta$  angle between initial capture and death was not related to  
488 change in body condition between initial capture and final recapture (Spearman  $S=76$ ,  
489  $\rho=0.09$ ,  $p=0.84$ ). The best mixed model to explain the shift in  $\theta$  during a 8-hour period was  
490 the one with the moment (morning, afternoon or night) of the period as the independent factor  
491 (LRT  $\chi^2=56.7$ ;  $p<0.0001$ ;  $R^2_m=0.08$ ;  $R^2_c=0.08$ ), followed by the null model including  
492 individual random effect only ( $\Delta AICc=51$ ), the model including estimated energy expenditure  
493 as the independent variable ( $\Delta AICc=56$ ), and the model including both temperature and TBF  
494 as independent variables ( $\Delta AICc=58$ ). According to the best model, the shift in  $\theta$  was negative  
495 during mornings (mean  $\pm$  standard deviation  $-1.25^\circ \pm 3.08$ ), slightly negative during afternoons  
496 ( $-0.23^\circ \pm 2.36$ ), and positive during the nights ( $0.89^\circ \pm 3.15$ ).

497

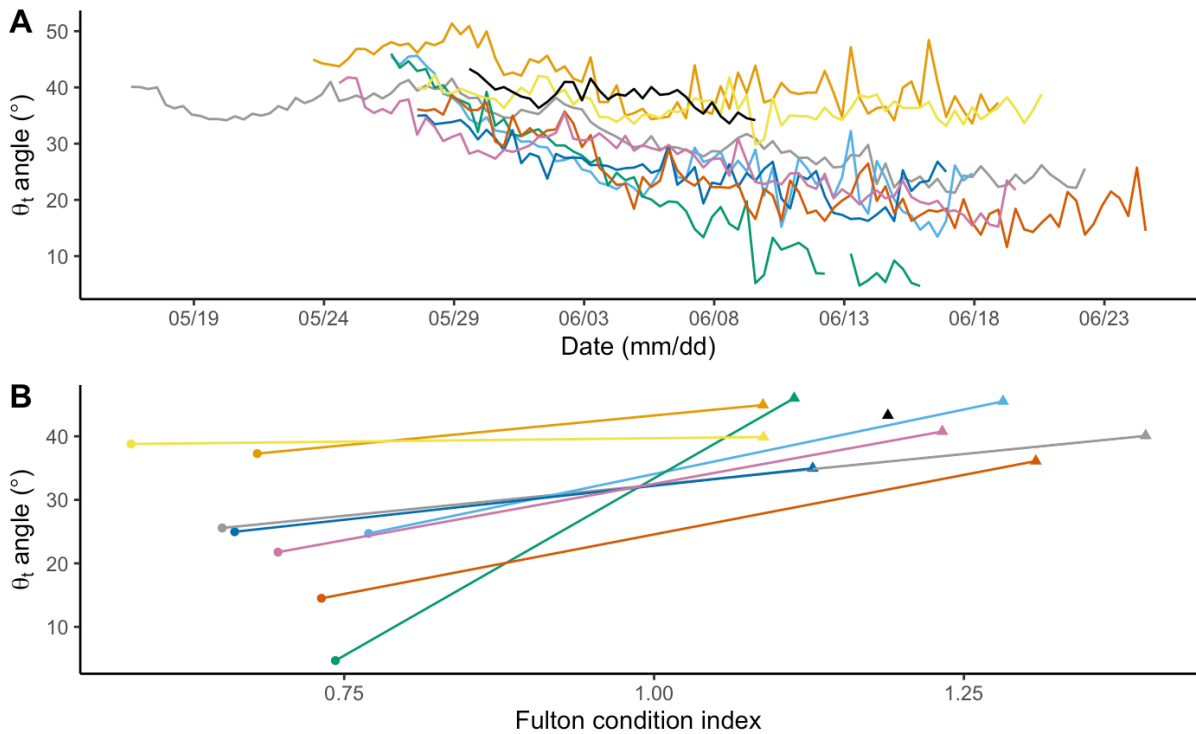

498

499 **Figure 6.** The  $\theta_t$  angle between the x-axis of the accelerometer and the vertical plane as an  
500 indicator of fish body roundness A. Temporal evolution of  $\theta$  computed each day along the  
501 spawning season for nine Allis shad. B. Relationship between Fulton coefficient of condition  
502 and  $\theta_t$  angle at initial release (triangles) and at recapture after death (points). Each individual is  
503 represented with the same colour as in Fig. 3, and black is for the individual whose tag stopped  
504 recording before the end of the experiment.

505

## 506 Discussion

507 In this study, we used acceleration data to quantify the dynamics of spawning acts,  
508 energy expenditure and slimming of Allis shad females throughout their spawning season. The  
509 results indicate that the spawning schedule of shad females, although constrained by the serial  
510 maturation of oocyte batches, was also influenced by temperature and social factors: females  
511 had a higher probability to spawn during warmer nights, spawned repeatedly during most of  
512 their active nights and females that spawned on the same nights synchronized their spawning



513 acts with each other. Tail beat frequency and water temperature recorded by the loggers showed  
514 that energy expenditure was slightly higher during night time than during daytime, and may  
515 have been so high that shad died from energy exhaustion before having spawned all their eggs.  
516 Finally, the novel use of gravitational acceleration to monitor fish slimming, although  
517 perfectible, seems a promising method to monitor changes in animal condition in the field.

518

### 519 [Dynamics of spawning acts and energy expenditure](#)

520 The number of spawning acts performed by female Allis shad ranged from 7 to 26, with  
521 an average of 15.75. So far, the average individual number of spawning acts was indirectly  
522 estimated to be either five (Acolas et al., 2006) or 12 (Fatin and Dartiguelongue 1996) by  
523 counting the number of acts heard upstream a dam where all passing individuals were censused.  
524 Such method provides no estimate of interindividual variability. In a first attempt to work at the  
525 individual level, Acolas et al. (2004) marked three females and three males with acoustic tags,  
526 and based on the number of detections of the tags near the surface (assessed by the reception  
527 power by hydrophones immersed at different depth), estimated that zero, one and two acts were  
528 performed by the females and three, 38 and 60 acts by the males. Here, despite a small sample,  
529 we estimated a more representative distribution of the number of acts per individual, as their  
530 detection on accelerograms is certainly more reliable than the method used by Acolas et al.  
531 (2004). This distribution, as well as the timing of spawning acts, is crucial to build a model  
532 estimating the number of shad in a river from the acoustic survey of spawning acts, as it is  
533 routinely done in European rivers (e.g. Chanseau et al. 2004). Such a model, simulating shad  
534 spawning behaviour in an Approximate Bayesian Computation framework (ABC; Csilléry et  
535 al. 2010) is available in French here: [https://ctentelier.shinyapps.io/alose\\_abc/](https://ctentelier.shinyapps.io/alose_abc/). The number of  
536 acts per female could be correlated to none of the few biometric variables collected, but the  
537 very small sample implied a weak statistical power. Larger females, which have more eggs and

538 more energy, did not perform more spawning acts (a nonsignificant tendency towards negative  
539 correlation was observed).

540       Beside oocyte maturation and temperature, the temporal distribution of spawning acts  
541 was aggregated within and among females. While each female was active for most of the  
542 population's spawning season, the individual spawning season was punctuated by three to six  
543 nights of activity generally corresponding to volleys of two to eight acts performed in a few  
544 tens of minutes, and separated by on average 3.5 nights of inactivity. The schedule of spawning  
545 acts must be constrained by the fragmented maturation of oocytes (Cassou-Leins and Cassou-  
546 Leins 1981; Olney et al. 2001), but also depended on temperature. Interestingly, while data  
547 collected at the population level indicate that spawning activity increases with temperature  
548 (Paumier et al. 2019), our data collected at the individual level showed that temperature  
549 increased the probability that a female performed some acts during the night (the zero-inflation  
550 component of the zero-inflated regression), but not the number of acts it performed (the count  
551 component of the zero-inflated regression). In fact, two results suggest that the dynamics of  
552 spawning acts within a night might be influenced by social factors. First, the temporal proximity  
553 of acts performed by a given female in a given night in this study, and the high proportion of  
554 acts performed without oocyte expulsion reported by Langkau et al. (2016) are reminiscent of  
555 female trout's 'false orgasm' (Petersson 2001) or female lamprey's 'sham mating' (Yamazaki  
556 and Koizumi 2017). For both of these species, it has been suggested that repeated spawning  
557 simulations enable the female to exert mate choice, by both exhausting the sperm stock of an  
558 unwanted courtier and signalling its mating activity to peripheral males. Second, spawning acts  
559 of different females in a given night were more synchronous than expected from the hour of  
560 spawning acts across all nights of the season. This suggests that a female which is ready to  
561 spawn (mature batch of oocytes) in a propitious night (warm temperature) may trigger its  
562 spawning acts when another female does so. Such fine scale synchrony in the mating activity

563 of different females may again affect sexual selection, reducing the environmental potential for  
564 polygyny by making it difficult for the same male to monopolize several females at the same  
565 time (Emlen and Oring 1977).

566 The end point in the spawning schedule of semelparous organisms is death, which  
567 occurred in female shad two to seven days after their last spawning act, and before they laid all  
568 their eggs, which suggests that energetic reserves were exhausted before egg stock. Combining  
569 acceleration and temperature data collected in the field with equations parametrized in  
570 laboratory experiments, we estimated that the energetic expenditure of spawning shad during  
571 three weeks of spawning ranged from 4 395 to 8 361 kJ (mean=6 277). This is surprisingly of  
572 the same order as female American shad, which entered the Connecticut river with a stock of  
573 12 000 kJ, of which approximately 5 000 kJ were consumed along their 228-km and seven-  
574 week long upstream migration in waters warming from 10 to 22°C (Leonard and McCormick  
575 1999; but see next section for possible biases in our estimation). Extreme pre-spawning energy  
576 expenditure caused by long migration, obstacle crossing or warm water can reduce the  
577 reproductive lifespan of semelparous females and hinder their ability to spawn their full egg  
578 stock (Hruska et al. 2011). While the spawning ground used by shad in our study is only 13 km  
579 from the river mouth with only one obstacle to pass (Uxondoa, where we captured them), the  
580 median daily temperature recorded in the Nivelle for May and June 2017 was 18.4°C, the  
581 second warmest spring since the beginning of record in 1984, the maximum being 18.5°C in  
582 1989, the minimum 14.6°C in 2013, and the median 16.9°C. According to our analysis of data  
583 from Leonard et al. (1999; our equation 1), an increase in temperature from 16.9 to 18.4°C  
584 would raise the energy expenditure by 8.3%, giving both a possible explanation for the inability  
585 of shad to spawn all their eggs before they die and a hint of the impact of global warming on  
586 the breeding performance of such species.

587 As expected from visual observations on spawning grounds, shads were more active at  
588 night than during the day, and stayed deeper during daytime when water was warmer. Although  
589 nocturnal spawning is usually interpreted as a strategy to decrease predation risk on spawners  
590 or eggs (Robertson 1991), resting in deeper, hence fresher, water during the warm hours of the  
591 day may also save energy for spawning at night. However, contrary to our predictions, the  
592 individuals who spent less energy during mornings or afternoons and more during the night did  
593 not have fewer residual eggs at death. Although our small sample size precludes conclusive  
594 inferences, the continuous measurement of spawning activity and energy expenditure at the  
595 individual level opens the door to the quantification and decomposition of interindividual  
596 variation in the schedule of reproductive behaviour and energy management. Moreover,  
597 coupling telemetric data on behaviour with additional fitness indicators such as offspring  
598 production (egg sampling and genetic parentage analysis) could inform on the strength of  
599 natural and sexual selection acting on these phenological strategies in the field (Tentelier et al.  
600 2016).

601

## 602 [Methodological considerations](#)

603 According to calculated energy expenditure, the energetic model predicted that shad  
604 should have lost on average 12% of their initial mass, which was much less than the observed  
605 42% loss. Of course, the energetic model did not account for egg expulsion, which must  
606 represent a large proportion of mass loss, given that ovaries can represent up to 15% of somatic  
607 mass at the onset of the spawning season (Cassou-Leins and Cassou-Leins 1981; Taverny  
608 1991). Moreover, the equations used to convert TBF and temperature to energy expenditure  
609 and mass loss were not parametrized with data obtained on *A. alosa* but on *A. sapidissima*  
610 (Castro-Santos & Letcher, 2010; Leonard et al., 1999; Leonard & McCormick, 1999) which is  
611 the species most closely related to *A. alosa* for which such reliable information exist. Although

612 American shad and Allis shad have the same morphology and ecology, some elements suggest  
613 that results on American shad could not exactly apply to our study on Allis shad, and that our  
614 estimates of energy expenditure should be taken cautiously. First, although the range of  
615 temperatures used by Leonard et al. (1999) were similar to the temperatures encountered by  
616 shad in our study, TBF of Allis shad in the field exceeded the fastest swim tested by Leonard  
617 et al. (1999). In particular, the brief bouts of very high TBF which correspond to spawning acts  
618 may represent anaerobic efforts, which are sustained by white muscle rather than red muscle  
619 and are more costly than the aerobic effort observed by Leonard et al. (1999). Given the  
620 difference in mechano-chemical efficiency (ratio of mechanical power output to chemical  
621 energy consumed) between red and white muscles, a different equation should be calibrated for  
622 each type of effort (Gleiss et al. 2011). The volleys of spawning acts performed by females in  
623 a few tens of minutes could even lead to sexual selection of traits affecting the recovery after  
624 sprint (Kieffer 2000). Second, the relationship linking swim speed to oxygen demand ( $MO_2$ )  
625 varies between species, even closely related, and American shad seems to have a particularly  
626 high metabolism compared to other clupeids (Leonard et al. 1999). This would have led to an  
627 overestimation of energy costs for *A. alosa*. Third, the relative contribution of lipids and  
628 proteins as metabolic fuel may differ between the iteroparous American shad and the  
629 semelparous Allis shad. Indeed, as migratory iteroparous fishes have to conserve proteins,  
630 especially in the red muscle, for their downstream migration, semelparous species can exhaust  
631 their protein stock to complete spawning (Schultz 1999). Also, Leonard & McCormick (1999)  
632 measured the relative expenditure of lipids and proteins in *migrating* American shad, while we  
633 monitored *spawning* Allis shad. It has been shown that most anadromous fishes catabolise  
634 proteins only when lipid reserves have been exhausted, in a way that lipids mainly fuel  
635 migration while proteins fuel spawning (Idler and Bitners 1958; Beamish et al. 1979; Jonsson  
636 et al. 1997; Hendry and Berg 1999). Given that proteins have a lower energy density than lipids,

637 the surprising high energy consumption and the low mass loss predicted by the energetic model  
638 may be explained by spawning Allis shad relying more on proteins than on lipids. All these  
639 caveats could be avoided by laboratory calibration of the equations relating energy expenditure  
640 to tail beat frequency and temperature on the same species, at the same stage of energy reserves,  
641 bearing the same tags and performing the same behaviours as in the field.

642 While the presence of the radio tag and the accelerometer may have imposed an  
643 energetic cost on shad due to additional mass (less than 2% of initial fish mass) and drag, several  
644 indicators suggest that our tagging method did not impact shad behaviour as heavily than the  
645 commonly gastric implants which result in high mortality rate or long post-tagging downstream  
646 movements (Steinbach et al. 1986; Verdeyroux et al. 2015; Tétard et al. 2016). Such  
647 downstream movements were only observed in 2018, after exceptional floods which have  
648 probably also make untagged shad drift downstream, especially after the spawning season.  
649 Although the dead individuals we retrieved in 2017 showed clear depigmentation, neither  
650 severe abrasion nor fungal proliferation was observed, even after one month in water at 18° C.  
651 Moreover, the eight females for which complete accelerograms were retrieved all spawned,  
652 three of them spawned the night directly following tagging, and the median of 14 spawning acts  
653 was above the five to twelve acts per individuals estimated by Acolas *et al.* (2006) and Fatin &  
654 Dartiguelongue (1996). However, shad may have suffered post-tagging stress, as indicated by  
655 the higher tail beat frequency (TBF) during the three days following tagging that during the  
656 remainder of the spawning season, consistent with the increased activity of Atlantic salmon  
657 during the three days after tagging (Føre et al. 2020). On the other hand, a higher TBF just after  
658 tagging may be due to the fish finishing their upstream migration, before settling near spawning  
659 grounds (unpublished radio tracking data). This moderate negative impact suggests that  
660 external tagging under the dorsal fin, provided fish are continually kept immersed and rapidly  
661 handled, is a suitable tagging technique for Allis shad (Jepsen et al. 2015; Breine et al. 2017).

662 Although the swimming behaviour did not seem to be strongly impaired, the additional weight  
663 or drag force caused by the tag may have increased the energy required to perform this  
664 behaviour (Jepsen et al. 2015). In this case, the energy expenditure of tagged fish computed  
665 from equations derived from swim tunnel experiments performed on untagged fish would be  
666 underestimated. To develop the telemetric measurement of realistic energy expenditure,  
667 attention should be paid to both designing tags that do not impose too much additional energetic  
668 costs on individuals and estimating these additional costs.

669 On top of the estimation of energetic costs from dynamic acceleration, the continuous  
670 estimation of body roundness from static acceleration is a promising yet perfectible application.  
671 Gravitational acceleration is commonly used to infer the posture of the animal, assuming that  
672 the position of the accelerometer on the animal is constant (Brown et al. 2013). Here, assuming  
673 that shad stayed upright for most of the time, gravitational acceleration was used as an indicator  
674 of change in body shape. In particular, we hypothesized that the angle  $\theta$  between the  $x$  axis of  
675 the accelerometer and the vertical plane may indicate body roundness. For all individuals,  $\theta$   
676 was higher at the beginning of the season than at the end, when the fish had thinned, and  
677 globally decreased along the spawning season. The accelerometer was attached under the dorsal  
678 fin, where the cross-section is the broadest, which probably maximized the sensitivity of  
679 acceleration data to fish slimming. Furthermore, shad mainly store energy for migration and  
680 spawning as subdermal fat and interstitial fat in the white muscle (Leonard and McCormick  
681 1999), whereas the limited consumption of visceral and liver fat may not have affected  $\theta$ .  
682 However, interindividual variability in  $\theta$  was not correlated to interindividual variability in  
683 body condition, and the shift in  $\theta$  was not correlated to individual mass loss during the spawning  
684 season. This could be due to interindividual differences in the exact position of the  
685 accelerometers on the fish, or in the relationship between body condition and roundness. Indeed,  
686 mass loss due to gamete expulsion was probably undetectable by the accelerometer attached to



687 the back of the fish. Given that ovaries can represent up to 15% of a shad mass at arrival on  
688 spawning grounds (Cassou-Leins and Cassou-Leins 1981; Taverny 1991), a significant loss of  
689 mass was probably not reflected in the rotation of the accelerometer across the spawning season.  
690 In fact, shift of  $\theta$  across eight hour periods increased with neither TBF, temperature, nor  
691 estimated energy expenditure, contrary to what was expected from the relationship linking TBF  
692 and temperature to energy consumption in American shad (Leonard et al. 1999). This lack of  
693 resolution may be due to the way tags were attached. In particular, while the attachment wires  
694 were tightened during the tagging procedure, fish slimming loosened them so the accelerometer  
695 must have jiggled more and more as fish thinned, thereby increasing the noise in acceleration  
696 data. Given all these results and limits, using the angle of the accelerometer to quantitatively  
697 track change in mass or body roundness will certainly require further tuning, such as laboratory  
698 experiment with repeated weighing and image analysis of the fish's cross-section, and drastic  
699 standardization of attachment procedure, but we consider it a promising method to monitor  
700 individual condition in the field. On top of slimming,  $\theta$  was linked to depth, and increased  
701 during some periods when the fish stayed closer to the surface, in particular during nights. This  
702 was probably due to the inflation of the swim bladder, which represents around 8% of the  
703 volume of the fish, and inflates as the fish stays closer to the surface (Alexander 1966).  
704 Although here, swim bladder inflation introduced additional variation in our monitoring of fish  
705 slimming, it could also be the process of interest in some field studies, for example to untangle  
706 the contribution of swim bladder inflation and active swimming in the vertical migration of  
707 pelagic fishes (e.g. Pelster 2015). This illustrates the potentially broad application of our  
708 acceleration-based approach, which, once refined, could be used to detect the many  
709 ecologically or behaviourally relevant changes in animal shape beyond slimming due to energy  
710 consumption, such as parturition, massive food intake in large predators (Cuyper et al. 2019),  
711 inflammatory swelling (Duncan et al. 2016), or inflation as a courtship or defence behaviour



712 (Wainwright and Turingan 1997). Combined with dynamic acceleration, such data could be  
713 used to test whether these changes in shape are associated to global activity or to the expression  
714 of specific behaviours.

## 715 [Acknowledgements](#)

716 We thank B. Liquet, F. Luthon, B. Larroque and E. Bouix for their help in the initial exploration  
717 of data, and J. Leonard and T. Castro-Santos for sharing their data on American shad. This  
718 study was financed by the Adour-Garonne Water Agency, and the French region Nouvelle  
719 Aquitaine.

## 720 [Conflict of interest disclosure](#)

721 The authors of this article declare that they have no financial conflict of interest with the  
722 content of this article.

## 723 References

- 724 Acolas M, Veron V, Jourdan H, Begout M, Sabatie M, Bagliniere J I. 2006. Upstream  
725 migration and reproductive patterns of a population of allis shad in a small river  
726 (L'Aulne, Brittany, France). doi:DOI:10.1016/j.icesjms.2005.05.022.
- 727 Acolas ML, Anras MLB, Véron V, Jourdan H, Sabatié MR, Baglinière JL. 2004. An  
728 assessment of the upstream migration and reproductive behaviour of allis shad (*Alosa*  
729 *alosa* L.) using acoustic tracking. ICES J Mar Sci. 61(8):1291–1304.  
730 doi:10.1016/j.icesjms.2004.07.023.
- 731 Alexander RM. 1966. Physical aspects of swimbladder function. Biological Reviews.  
732 41(1):141–176. doi:10.1111/j.1469-185X.1966.tb01542.x.
- 733 Anderson SS, Fedak MA. 1985. Grey seal males: energetic and behavioural links between  
734 size and sexual success. Animal Behaviour. 33(3):829–838. doi:10.1016/S0003-  
735 3472(85)80017-8.
- 736 Baglinière J-L, Elie P. 2000. Les Aloses (*Alosa alosa* et *Alosa fallax* spp.): écobiologie et  
737 variabilité des populations. Editions Quae.
- 738 Baglinière J-L, Sabatié M-R, Rochard E, Alexandrino P, Aprahamian MW. 2003. The Allis  
739 shad *Alosa alosa*: Biology, ecology, range and status of populations. In: Biology, Status  
740 and Conservation of the World's Shads. American Fisheries Society. p. 85–102.
- 741 Barton K. 2009. MuMIn: Multimodel inference. [https://cran.r-](https://cran.r-project.org/web/packages/MuMIn/index.html)  
742 [project.org/web/packages/MuMIn/index.html](https://cran.r-project.org/web/packages/MuMIn/index.html).
- 743 Bates D, Maechler M, Bolker B, Walker S. 2014. lme4: Linear mixed-effects models using  
744 Eigen and S4.
- 745 Beamish FWH, Potter IC, Thomas E. 1979. Proximate composition of the adult anadromous  
746 sea lamprey, *Petromyzon marinus*, in relation to feeding, migration and reproduction.  
747 Journal of Animal Ecology. 48(1):1–19. doi:10.2307/4096.

- 748 Bengen GSH. 1992. Suivi de la maturation gonadique des aloses, *Alosa alosa* L. lors de leur  
749 migration en Garonne. PhD thesis, Toulouse, France: Institut national polytechnique.
- 750 Bonnet X, Bradshaw D, Shine R. 1998. Capital versus income breeding: an ectothermic  
751 perspective. *Oikos*. 83(2):333–342.
- 752 Borgia G. 1985. Bower quality, number of decorations and mating success of male satin  
753 bowerbirds (*Ptilonorhynchus violaceus*): an experimental analysis. *Animal Behaviour*.  
754 33(1):266–271. doi:10.1016/S0003-3472(85)80140-8.
- 755 Breine J, Pauwels IS, Verhelst P, Vandamme L, Baeyens R, Reubens J, Coeck J. 2017.  
756 Successful external acoustic tagging of twaite shad *Alosa fallax* (Lacépède 1803).  
757 *Fisheries Research*. 191(Supplement C):36–40. doi:10.1016/j.fishres.2017.03.003.
- 758 Brett JR, Groves TDD. 1979. Physiological energetics. In: Hoar WS, Randall DJ, Brett JR,  
759 editors. *Bioenergetics and growth*. Vol. 8. Academic Press. New York. (Fish physiology).  
760 p. 279–352.
- 761 Broell F, Taggart CT. 2015. Scaling in free-swimming fish and implications for measuring  
762 size-at-time in the wild. *PLoS One*. 10(12). doi:10.1371/journal.pone.0144875.
- 763 Brooks ME, Kristensen K, Benthem KJ van, Magnusson A, Berg CW, Nielsen A, Skaug HJ,  
764 Mächler M, Bolker BM. 2017. glmmTMB balances speed and flexibility among packages  
765 for zero-inflated generalized linear mixed modeling. *The R Journal*. 9(2):378–400.
- 766 Brown DD, Kays R, Wikelski M, Wilson R, Klimley AP. 2013. Observing the unwatchable  
767 through acceleration logging of animal behavior. *Animal Biotelemetry*. 1(1):1–16.  
768 doi:10.1186/2050-3385-1-20.
- 769 Brownscombe JW, Lennox RJ, Danylchuk AJ, Cooke SJ. 2018. Estimating fish swimming  
770 metrics and metabolic rates with accelerometers: the influence of sampling frequency. *J*  
771 *Fish Biol*. 93(2):207–214. doi:10.1111/jfb.13652.
- 772 Casas J, Pincebourde S, Mandon N, Vannier F, Poujol R, Giron D. 2005. Lifetime nutrient

- 773 dynamics reveal simultaneous capital and income breeding in a parasitoid. *Ecology*.  
774 86(3):545–554. doi:10.1890/04-0812.
- 775 Cassou-Leins F, Cassou-Leins J-J. 1981. Recherches sur la biologie et l'halieutique des  
776 migrateurs de la Garonne et principalement l'alose : *Alosa alosa*. PhD thesis, Institut  
777 National Polytechnique de Toulouse.
- 778 Castro-Santos T, Letcher BH. 2010. Modeling migratory energetics of Connecticut River  
779 American shad (*Alosa sapidissima*): implications for the conservation of an iteroparous  
780 anadromous fish. *Can J Fish Aquat Sci*. 67(5):806–830. doi:10.1139/F10-026.
- 781 Chanseau M, Castelnaud G, Carry L, Martin-Vandembulcke D, Belaud A. 2004. Essai  
782 d'évaluation du stock de géniteurs d'alose *Alosa alosa* du bassin versant Gironde-  
783 Garonne-Dordogne sur la période 1987-2001 et comparaison de différents indicateurs  
784 d'abondance. *Bulletin Français de la Pêche et de la Pisciculture*.(374):1–19.  
785 doi:10.1051/kmae:2004023.
- 786 Collins PM, Halsey LG, Arnould JPY, Shaw PJA, Dodd S, Green JA. 2016. Energetic  
787 consequences of time-activity budgets for a breeding seabird. *J Zool*. 300(3):153–162.  
788 doi:10.1111/jzo.12370.
- 789 Craig JF, Kenley MJ, Talling JF. 1978. Comparative estimations of the energy content of fish  
790 tissue from bomb calorimetry, wet oxidation and proximate analysis. *Freshwater Biology*.  
791 8(6):585–590. doi:10.1111/j.1365-2427.1978.tb01480.x.
- 792 Csilléry K, Blum MGB, Gaggiotti OE, François O. 2010. Approximate Bayesian  
793 Computation (ABC) in practice. *Trends in Ecology & Evolution*. 25(7):410–418.  
794 doi:10.1016/j.tree.2010.04.001.
- 795 Cuyper AD, Clauss M, Carbone C, Codron D, Cools A, Hesta M, Janssens GPJ. 2019.  
796 Predator size and prey size–gut capacity ratios determine kill frequency and carcass  
797 production in terrestrial carnivorous mammals. *Oikos*. 128(1):13–22.

- 798       doi:10.1111/oik.05488.
- 799   Duncan AE, Torgerson-White LL, Allard SM, Schneider T. 2016. An evaluation of infrared  
800       thermography for detection of bumblefoot (pododermatitis) in penguins. *J Zoo Wildl*  
801       *Med.* 47(2):474–485. doi:10.1638/2015-0199.1.
- 802   ECP. 2018. Ecology and Fish Population Biology Facility.  
803       doi:10.15454/1.5572402068944548E12.
- 804   Emlen ST, Oring LW. 1977. Ecology, sexual selection, and the evolution of mating systems.  
805       *Science.* 197(4300):215–223. doi:10.1126/science.327542.
- 806   Fatin D, Dartiguelongue J. 1996. Etude préliminaire de la reproduction des aloses en 1995  
807       entre Tuilières et Mauzac sur la Dordogne.
- 808   Føre M, Svendsen E, Økland F, Gräns A, Alfredsen JA, Finstad B, Hedger R, Uglem I. 2020.  
809       Heart rate and swimming activity as indicators of post-surgical recovery time of Atlantic  
810       salmon (*Salmo salar*). doi:10.21203/rs.3.rs-23506/v1.
- 811   Fürtbauer I, Mundry R, Heistermann M, Schülke O, Ostner J. 2011. You mate, I mate:  
812       Macaque females synchronize sex not cycles. *PLOS ONE.* 6(10):e26144.  
813       doi:10.1371/journal.pone.0026144.
- 814   Gauthey Z, Freychet M, Manicki A, Herman A, Lepais O, Panserat S, Elozegi A, Tentelier C,  
815       Labonne J. 2015. The concentration of plasma metabolites varies throughout  
816       reproduction and affects offspring number in wild brown trout (*Salmo trutta*).  
817       *Comparative Biochemistry and Physiology Part A: Molecular & Integrative Physiology.*  
818       184:90–96. doi:10.1016/j.cbpa.2015.01.025.
- 819   Gleiss AC, Wilson RP, Shepard ELC. 2011. Making overall dynamic body acceleration work:  
820       on the theory of acceleration as a proxy for energy expenditure. *Methods in Ecology and*  
821       *Evolution.* 2(1):23–33. doi:10.1111/j.2041-210X.2010.00057.x.
- 822   Gochfeld M. 1980. Mechanisms and adaptive value of reproductive synchrony in colonial

- 823 seabirds. In: Burger J, Olla BL, Winn HE, editors. Behavior of marine animals: Current  
824 perspectives in research. Marine birds. Boston, MA: Springer US. p. 207–270.
- 825 Groscolas R, Viera V, Guerin N, Handrich Y, Côté SD. 2010. Heart rate as a predictor of  
826 energy expenditure in undisturbed fasting and incubating penguins. Journal of  
827 Experimental Biology. 213(1):153–160. doi:10.1242/jeb.033720.
- 828 Heimpel GE, Rosenheim JA. 1998. Egg limitation in parasitoids: A review of the evidence  
829 and a case study. Biological Control. 11(2):160–168. doi:10.1006/bcon.1997.0587.
- 830 Hendry AP, Beall E. 2004. Energy use in spawning Atlantic salmon. Ecology of Freshwater  
831 Fish. 13(3):185–196. doi:10.1111/j.1600-0633.2004.00045.x.
- 832 Hendry AP, Berg OK. 1999. Secondary sexual characters, energy use, senescence, and the  
833 cost of reproduction in sockeye salmon. Can J Zool. 77(11):1663–1675. doi:10.1139/z99-  
834 158.
- 835 Hicks O, Burthe S, Daunt F, Butler A, Bishop C, Green JA. 2017. Validating accelerometry  
836 estimates of energy expenditure across behaviours using heart rate data in a free-living  
837 seabird. Journal of Experimental Biology.:jeb.152710. doi:10.1242/jeb.152710.
- 838 Hruska KA, Hinch SG, Patterson DA, Healey MC. 2011. Egg retention in relation to arrival  
839 timing and reproductive longevity in female sockeye salmon (*Oncorhynchus nerka*). Can  
840 J Fish Aquat Sci. 68(2):250–259. doi:10.1139/F10-153.
- 841 Hughes PW. 2017. Between semelparity and iteroparity: Empirical evidence for a continuum  
842 of modes of parity. Ecol Evol. 7(20):8232–8261. doi:10.1002/ece3.3341.
- 843 Idler DR, Bitners I. 1958. Biochemical studies on sockeye salmon during spawning migration:  
844 Ii. Cholesterol, fat, protein, and water in the flesh of standard fish. Can J Biochem  
845 Physiol. 36(8):793–798. doi:10.1139/o58-084.
- 846 Ims RA. 1990. The ecology and evolution of reproductive synchrony. Trends in Ecology &  
847 Evolution. 5(5):135–140.

- 848 Jepsen N, Thorstad EB, Havn T, Lucas MC. 2015. The use of external electronic tags on fish:  
849 an evaluation of tag retention and tagging effects. *Animal Biotelemetry*. 3(1):49.  
850 doi:10.1186/s40317-015-0086-z.
- 851 Jonsson N, Jonsson B, Hansen LP. 1997. Changes in proximate composition and estimates of  
852 energetic costs during upstream migration and spawning in Atlantic salmon *Salmo salar*.  
853 *Journal of Animal Ecology*. 66(3):425–436. doi:10.2307/5987.
- 854 Jovani R, Grimm V. 2008. Breeding synchrony in colonial birds: from local stress to global  
855 harmony. *Proceedings of the Royal Society B: Biological Sciences*. 275(1642):1557–  
856 1564. doi:10.1098/rspb.2008.0125.
- 857 Kawabe R, Kawano T, Nakano N, Yamashita N, Hiraishi T, Naito Y. 2003. Simultaneous  
858 measurement of swimming speed and tail beat activity of free-swimming rainbow trout  
859 *Oncorhynchus mykiss* using an acceleration data-logger. *Fisheries science*. 69(5):959–  
860 965. doi:10.1046/j.1444-2906.2003.00713.x.
- 861 Kieffer JD. 2000. Limits to exhaustive exercise in fish. *Comp Biochem Physiol, Part A Mol*  
862 *Integr Physiol*. 126(2):161–179.
- 863 Kirkendall LR, Stenseth NChr. 1985. On defining ‘breeding once’. *The American Naturalist*.  
864 125(2):189–204.
- 865 Koizumi I, Shimatani IK. 2016. Socially induced reproductive synchrony in a salmonid: an  
866 approximate Bayesian computation approach. *Behav Ecol*. 27(5):1386–1396.  
867 doi:10.1093/beheco/arw056.
- 868 Langkau MC, Clavé D, Schmidt MB, Borcharding J. 2016. Spawning behaviour of Allis shad  
869 *Alosa alosa*: new insights based on imaging sonar data. *J Fish Biol*. 88(6):2263–2274.  
870 doi:10.1111/jfb.12978.
- 871 Leonard JBK, McCormick SD. 1999. Effects of migration distance on whole-body and tissue-  
872 specific energy use in American shad (*Alosa sapidissima*). *Can J Fish Aquat Sci*.

- 873 56(7):1159–1171. doi:10.1139/f99-041.
- 874 Leonard JBK, Norieka JF, Kynard B, McCormick SD. 1999. Metabolic rates in an  
875 anadromous clupeid, the American shad (*Alosa sapidissima*). J Comp Physiol B. 169(4–  
876 5):287–295. doi:10.1007/s003600050223.
- 877 Mennesson-Boisneau C, Boisneau P. 1990. Migration, répartition, reproduction,  
878 caractéristiques biologiques et taxonomie des aloses (*Alosa* sp) dans le bassin de la Loire.  
879 PhD thesis, Université de Rennes et Paris XII.
- 880 Nagy KA, Girard IA, Brown TK. 1999. Energetics of free-ranging mammals, reptiles, and  
881 birds. Annu Rev Nutr. 19:247–277. doi:10.1146/annurev.nutr.19.1.247.
- 882 Olney JE, Denny SC, Hoenig JM. 2001. Criteria for determining maturity stage in female  
883 American shad, *Alosa sapidissima*, and a proposed reproductive cycle. Bull Fr Pêche  
884 Piscic.(362–363):881–901. doi:10.1051/kmae:2001025.
- 885 Paumier A, Drouineau H, Carry L, Nachón DJ, Lambert P. 2019. A field-based definition of  
886 the thermal preference during spawning for allis shad populations (*Alosa alosa*).  
887 Environmental Biology of Fishes. 102(6):845–855. doi:10.1007/s10641-019-00874-7.
- 888 Pelster B. 2015. Swimbladder function and the spawning migration of the European eel  
889 *Anguilla anguilla*. Front Physiol. 5. doi:10.3389/fphys.2014.00486.
- 890 Petersson E. 2001. ‘False orgasm’ in female brown trout: trick or treat? Animal Behaviour.  
891 61(2):497–501. doi:10.1006/anbe.2000.1585.
- 892 Pianka ER. 1976. Natural selection of optimal reproductive tactics. American Zoologist.  
893 16(4):775–784.
- 894 R Development Core Team. 2008. R: A language and environment for statistical computing.  
895 R Foundation for Statistical Computing, Vienna, Austria. <http://www.R-project.org>.
- 896 Rands SA, Houston AI, Cuthill IC. 2006. Measurement of mass change in breeding birds: A  
897 bibliography and discussion of measurement techniques. Ringing & Migration. 23(1):1–



- 898 5. doi:10.1080/03078698.2006.9674337.
- 899 Robertson DR. 1991. The role of adult biology in the timing of spawning of tropical reef  
900 fishes. In: Sale PF, editor. The Ecology of fishes on coral reefs. San Diego: Academic  
901 Press. p. 356–386.  
902 <http://www.sciencedirect.com/science/article/pii/B9780080925516500180>.
- 903 Roff D. 1993. Evolution of life histories: Theory and analysis. Springer Science & Business  
904 Media.
- 905 Schultz DL. 1999. Comparison of lipid levels during spawning in annual and perennial darters  
906 of the subgenus *Boleosoma*, *Etheostoma perlongum*, and *Etheostoma olmstedi*. *Copeia*.  
907 1999(4):906–916. doi:10.2307/1447966.
- 908 Stearns SC. 1992. The evolution of life histories. OUP Oxford.
- 909 Steinbach P, Gueneau P, Autuoro A, Broussard D. 1986. Radio-pistage de grandes aloses  
910 adultes en Loire. *Bulletin Français de la Pêche et de la Pisciculture*.(302):106–117.  
911 doi:10.1051/kmae:1986007.
- 912 Taverny C. 1991. Contribution à la connaissance de la dynamique des populations d’aloses :  
913 *Alosa Alosa* et *Alosa Fallax* dans le système fluvio-estuarien de la Gironde : pêche,  
914 biologie et écologie : étude particulière de la devalaison et de l’impact des activités  
915 humaines. PhD thesis, Université de Bordeaux 1.
- 916 Tentelier C, Larranaga N, Lepais O, Manicki A, Rives J, Lange F. 2016. Space use and its  
917 effects on reproductive success of anadromous Atlantic salmon. *Canadian Journal of*  
918 *Fisheries and Aquatic Sciences*. 73(10):1461–1471. doi:10.1139/cjfas-2015-0518.
- 919 Tétard S, Feunteun E, Bultel E, Gadais R, Bégout M-L, Trancart T, Lasne E. 2016. Poor oxie  
920 conditions in a large estuary reduce connectivity from marine to freshwater habitats of a  
921 diadromous fish. *Estuarine, Coastal and Shelf Science*. 169:216–226.  
922 doi:10.1016/j.ecss.2015.12.010.

- 923 Tsuda Y, Kawabe R, Tanaka H, Mitsunaga Y, Hiraishi T, Yamamoto K, Nashimoto K. 2006.  
924 Monitoring the spawning behaviour of chum salmon with an acceleration data logger.  
925 Ecology of Freshwater Fish. 15(3):264–274. doi:10.1111/j.1600-0633.2006.00147.x.
- 926 Verdeyroux P, Guerri O, Chanseau M, Cazeaux J, Fauvel F, Bogun F, Desmoulin A, Tarrene  
927 C, Nicole T, Dubois A, et al. 2015. Radio-telemetry study of the Allis shad (*Alosa alosa*)  
928 migration at Bergerac and Tuilières along the Dordogne river and at Golfech along the  
929 Garonne river from 2011 to 2014. Epidor.
- 930 Wainwright PC, Turingan RG. 1997. Evolution of pufferfish inflation behavior. Evolution.  
931 51(2):506–518. doi:10.1111/j.1558-5646.1997.tb02438.x.
- 932 Wilson RP, Börger L, Holton MD, Scantlebury DM, Gómez-Laich A, Quintana F, Rosell F,  
933 Graf PM, Williams H, Gunner R, et al. 2019. Estimates for energy expenditure in free-  
934 living animals using acceleration proxies: A reappraisal. Journal of Animal Ecology.  
935 89(1):161–172. doi:10.1111/1365-2656.13040.
- 936 Wilson RP, White CR, Quintana F, Halsey LG, Liebsch N, Martin GR, Butler PJ. 2006.  
937 Moving towards acceleration for estimates of activity-specific metabolic rate in free-  
938 living animals: the case of the cormorant. J Anim Ecol. 75(5):1081–1090.  
939 doi:10.1111/j.1365-2656.2006.01127.x.
- 940 Yamazaki C, Koizumi I. 2017. High frequency of mating without egg release in highly  
941 promiscuous nonparasitic lamprey *Lethenteron kessleri*. J Ethol. 35(2):237–243.  
942 doi:10.1007/s10164-017-0505-0.
- 943
